# Supplementary figures and images for: Alterations of Sexual and Erectile Functions after Brachytherapy for Prostate Cancer Based on Patient-Reported Questionnaires
Source: Hindawi journal article supplement (doi:10.1155/2024/5729185), 2024-01-25

**LDR BT**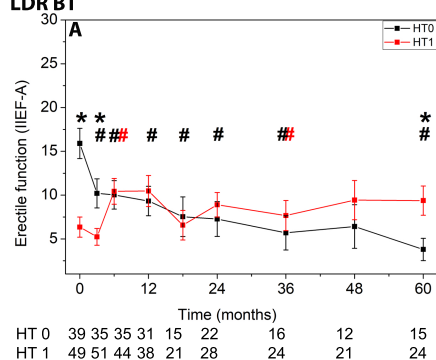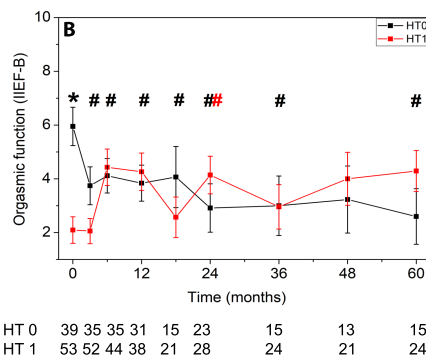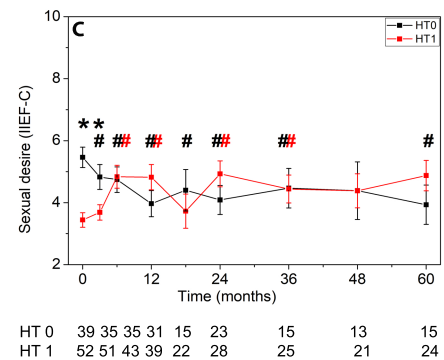**HDR BT**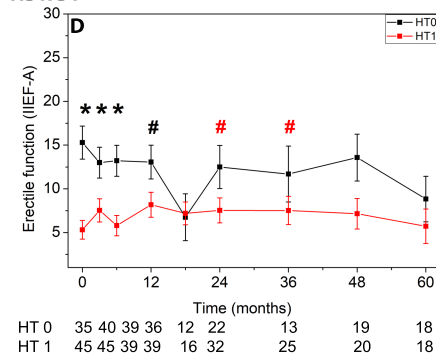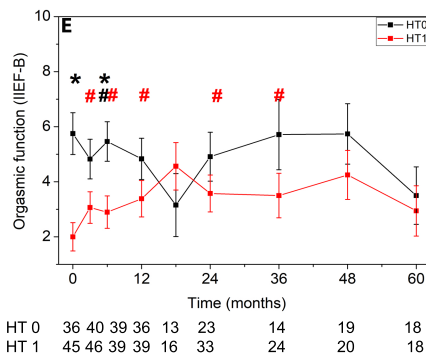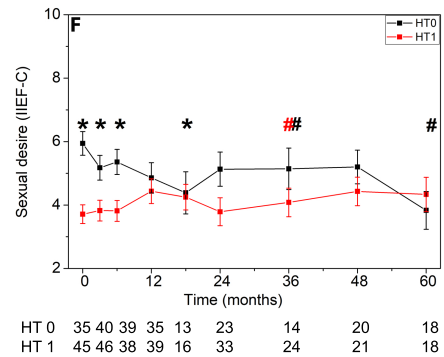**LDR BT**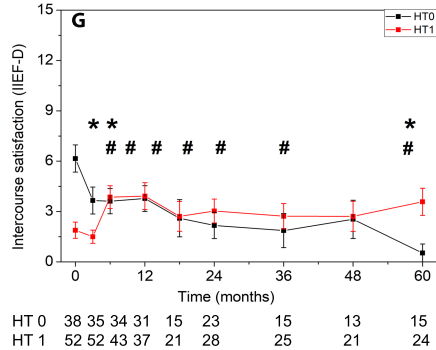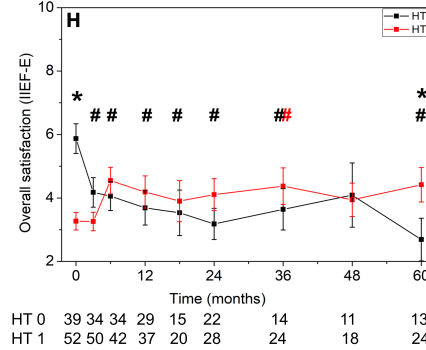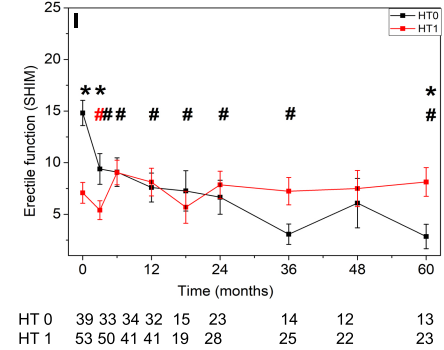**HDR BT**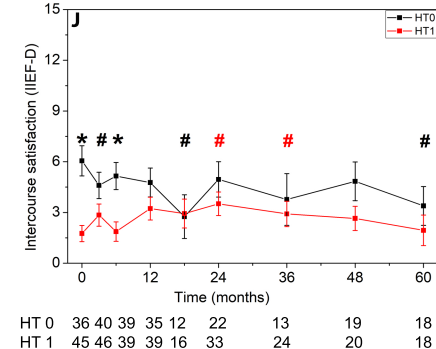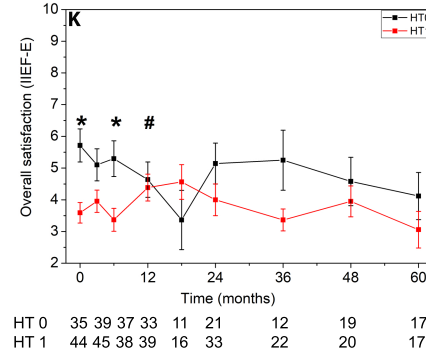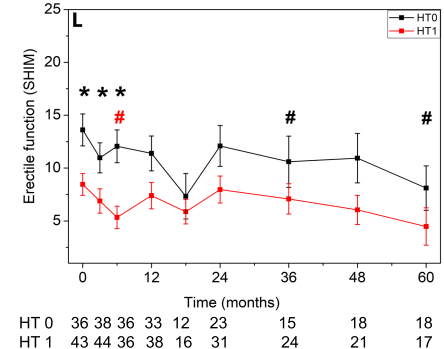

Supplement: f1 [file 5729185.f1.zip]

## LDR BT

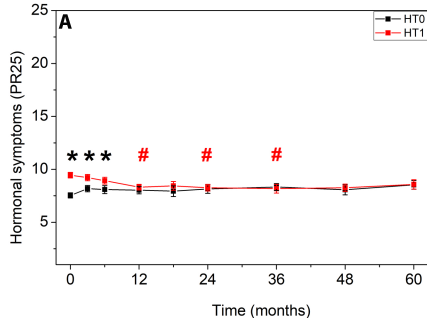

|      |    |    |    |    |    |    |    |    |    |
|------|----|----|----|----|----|----|----|----|----|
| HT 0 | 39 | 34 | 34 | 32 | 16 | 27 | 18 | 14 | 15 |
| HT 1 | 49 | 55 | 42 | 44 | 23 | 30 | 29 | 23 | 26 |

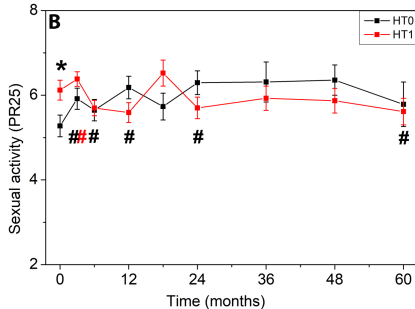

|      |    |    |    |    |    |    |    |    |    |
|------|----|----|----|----|----|----|----|----|----|
| HT 0 | 40 | 36 | 34 | 33 | 15 | 27 | 16 | 14 | 14 |
| HT 1 | 50 | 55 | 43 | 44 | 23 | 30 | 28 | 23 | 26 |

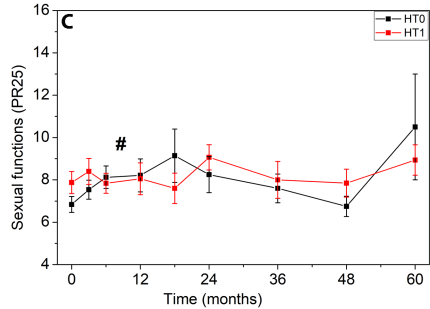

|      |    |    |    |    |    |    |    |    |    |
|------|----|----|----|----|----|----|----|----|----|
| HT 0 | 25 | 13 | 16 | 14 | 7  | 4  | 5  | 4  | 2  |
| HT 1 | 16 | 15 | 25 | 20 | 10 | 15 | 12 | 13 | 16 |

## HDR BT

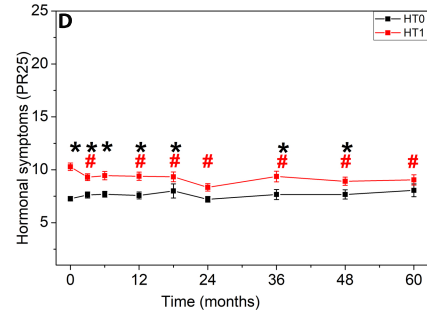

|      |    |    |    |    |    |    |    |    |    |
|------|----|----|----|----|----|----|----|----|----|
| HT 0 | 37 | 40 | 42 | 40 | 13 | 28 | 18 | 21 | 17 |
| HT 1 | 41 | 47 | 40 | 38 | 18 | 38 | 30 | 24 | 21 |

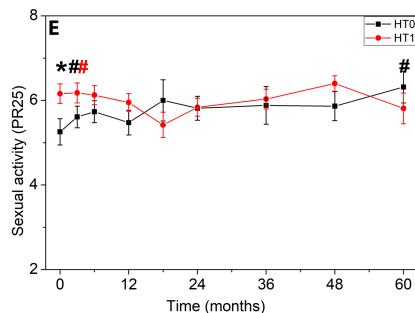

|      |    |    |    |    |    |    |    |    |    |
|------|----|----|----|----|----|----|----|----|----|
| HT 0 | 35 | 41 | 41 | 40 | 15 | 27 | 17 | 22 | 19 |
| HT 1 | 44 | 45 | 40 | 40 | 19 | 37 | 31 | 25 | 21 |

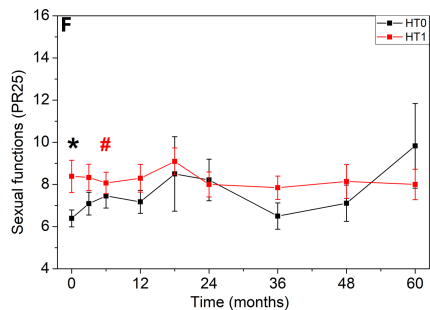

|      |    |    |    |    |    |    |    |   |   |
|------|----|----|----|----|----|----|----|---|---|
| HT 0 | 23 | 22 | 22 | 17 | 6  | 14 | 8  | 9 | 6 |
| HT 1 | 13 | 18 | 14 | 17 | 11 | 16 | 13 | 7 | 7 |

Supplement: f1 [file 5729185.f1.zip]
